# Supplementary material
Source: MDPI journal article supplement (https://www.mdpi.com/2071-1050/15/15/11494)
Supplement: s1 [file s1]

## SUPPLEMENTARY MATERIAL

### **The high-value product, bio-waste, and eco-friendly energy as the tripod of the microalgae biorefinery: Connecting the dots**

Rosangela Rodrigues Dias<sup>1</sup>, Mariany Costa Deprá<sup>1</sup>, Cristiano Ragagnin de Menezes<sup>1</sup>,  
Leila Queiroz Zepka<sup>1</sup>, and Eduardo Jacob-Lopes<sup>1</sup>

<sup>1</sup>Bioprocess Intensification Group, Federal University of Santa Maria, UFSM, Roraima

Avenue 1000, 97105-900, Santa Maria, RS, Brazil, Tel. +55 55 3220 8822

\*Corresponding author. E-mail Address: ejacoblopes@gmail.com

**Table S1.** Overview of potential applications and market estimation of microalgae-based bioproducts.

**Table S2.** Characterization factors of the environmental impacts for onshore wind, photovoltaic from amorphous silicon solar cells (a-Si), and coal-based fossil energy.

**Table S3.** Characterized values of the environmental impact associated with the biorefinery from *Dunaliella salina*.

**Table S1.** Overview of potential applications and market estimation [1] of microalgae-based bioproducts.

| Product           | Relevant segments                              | Application potential                                                                                                                                                                                                                                                                                        | Market demand (million USD) |
|-------------------|------------------------------------------------|--------------------------------------------------------------------------------------------------------------------------------------------------------------------------------------------------------------------------------------------------------------------------------------------------------------|-----------------------------|
| $\beta$ -carotene | food industries                                | enhance color in juices, yogurts and bakeries;                                                                                                                                                                                                                                                               | 1,105.00                    |
|                   | animal feed                                    | Poultry diet - contribute to the desirable color of the egg yolk;<br>Aquaculture - promotes the desirable pink/red color of crustaceans, salmons, and other farmed fish;<br><br>Preservation agents – slow down the oxidation process, thereby reducing food degradation and the development of off-flavors; |                             |
|                   | cosmetics                                      | active ingredients with biological activity in creams and lotions;                                                                                                                                                                                                                                           |                             |
|                   | nutracêuticos                                  | source of dietary supplements;                                                                                                                                                                                                                                                                               |                             |
|                   |                                                |                                                                                                                                                                                                                                                                                                              |                             |
| Defatted biomass  | animal and human feed;<br>bioenergy;           | protein feed source; additive or as a macro-ingredient;<br>bioethanol                                                                                                                                                                                                                                        | 720.51                      |
| Bulk oil          | food industries; soap industries;<br>bioenergy | food supplement; biodiesel; feedstocks;                                                                                                                                                                                                                                                                      |                             |

**Table S2.** Characterization factors of the environmental impacts for onshore wind, photovoltaic from amorphous silicon solar cells (a-Si), and coal-based fossil energy.

Obtained from Milousi et al. [2] and Hosseini et al [3].

| Impact Category                         | Unit                         | a-Si     | Coal    | Onshore wind |
|-----------------------------------------|------------------------------|----------|---------|--------------|
| Global warming                          | kg CO <sub>2</sub> -eq/kWh   | 4.35E-2  | 1.08    | 1.55E-02     |
| Stratospheric ozone depletion           | kg CFC11-eq/kWh              | 1.70E-8  | 1.67E-7 | 6.76E-09     |
| Ionizing radiation                      | kBq Co-60-eq/kWh             | 3.95E-3  | 2.53E-3 | 8.90E-04     |
| Ozone formation, human health           | kg NO <sub>x</sub> -eq/kWh   | 9.83E-5  | 1.66E-3 | 4.65E-05     |
| Fine particulate matter formation       | kg PM <sub>2.5</sub> -eq/kWh | 1.09E-4  | 1.18E-3 | 2.92E-05     |
| Ozone formation, terrestrial ecosystems | kg NO <sub>x</sub> -eq/kWh   | 1.01E-4  | 1.66E-3 | 4.85E-05     |
| Terrestrial acidification               | kg SO <sub>2</sub> -eq/kWh   | 2.25E-4  | 3.84E-3 | 5.33E-05     |
| Freshwater eutrophication               | kg P-eq/kWh                  | 3.55E-5  | 2.45E-3 | 7.20E-06     |
| Terrestrial ecotoxicity                 | kg 1,4-DCB-eq/kWh            | 4.69E-1  | 3.55E-1 | 8.33E-02     |
| Freshwater ecotoxicity                  | kg 1,4-DCB-eq/kWh            | 1.11E-2  | 6.04E-2 | 7.96E-03     |
| Marine ecotoxicity                      | kg 1,4-DBC-eq/kWh            | 1.43E-2  | 8.30E-2 | 9.80E-03     |
| Human carcinogenic toxicity             | kg 1,4-DBC-eq/kWh            | 6.50E-3  | 1.21E-1 | 2.34E-02     |
| Human non-carcinogenic toxicity         | kg 1,4-DBC-eq/kWh            | 1.46E-1  | 2.42    | 3.82E-02     |
| Land use                                | m <sup>2</sup> a crop-eq/kWh | 1.13E-3  | 1.91E-3 | 1.81E-03     |
| Mineral resource scarcity               | kg Cu-eq/kWh                 | 6.60E-4  | 1.24E-4 | 3.67E-04     |
| Fossil resource scarcity                | kg oil-eq/kWh                | 1.04E-02 | 2.37E-1 | 4.20E-03     |
| Water consumption                       | m <sup>3</sup> /kWh          | 4.51E-4  | 2.17E-3 | 1.92E-04     |

**Table S3.** Characterized values of the environmental impact associated with the biorefinery from *Dunaliella salina*.

| Impact Category                                  | Unit                      | Total    | $\beta$ -carotene | Bulk oil | Defatted biomass |
|--------------------------------------------------|---------------------------|----------|-------------------|----------|------------------|
| <b>Coal</b>                                      |                           |          |                   |          |                  |
| Fine particulate matter formation                | kg PM <sub>2.5</sub> eq.  | 6.04E+02 | 6.00E+02          | 3.58E+00 | 1.09E+00         |
| Fossil resource scarcity                         | kg oil eq.                | 1.21E+05 | 1.20E+05          | 7.18E+02 | 2.19E+02         |
| Freshwater ecotoxicity                           | kg 1,4-DCB eq.            | 3.09E+04 | 3.07E+04          | 1.83E+02 | 5.57E+01         |
| Freshwater eutrophication                        | kg P eq.                  | 1.25E+03 | 1.25E+03          | 7.42E+00 | 2.26E+00         |
| Global warming potential                         | kg CO <sub>2</sub> eq.    | 5.53E+05 | 5.49E+05          | 3.27E+03 | 9.97E+02         |
| Human carcinogenic toxicity                      | kg 1,4-DCB eq.            | 6.20E+04 | 6.15E+04          | 3.67E+02 | 1.12E+02         |
| Human non-carcinogenic toxicity                  | kg 1,4-DCB eq.            | 1.24E+06 | 1.23E+06          | 7.33E+03 | 2.23E+03         |
| Ionizing radiation                               | kbq Co-60 eq.             | 1.30E+03 | 1.29E+03          | 7.67E+00 | 2.33E+00         |
| Land use                                         | m <sup>2</sup> a crop eq. | 9.78E+02 | 9.71E+02          | 5.79E+00 | 1.76E+00         |
| Marine ecotoxicity                               | kg 1,4-DCB eq.            | 4.25E+04 | 4.22E+04          | 2.51E+02 | 7.66E+01         |
| Mineral resource scarcity                        | kg Cu eq.                 | 6.35E+01 | 6.30E+01          | 3.76E-01 | 1.14E-01         |
| Ozone formation affecting human health           | kg NO <sub>x</sub> eq.    | 8.50E+02 | 8.44E+02          | 5.03E+00 | 1.53E+00         |
| Ozone formation affecting terrestrial ecosystems | kg NO <sub>x</sub> eq.    | 8.50E+02 | 8.44E+02          | 5.03E+00 | 1.53E+00         |
| Stratospheric ozone depletion                    | kg CFC11 eq.              | 8.55E-02 | 8.49E-02          | 5.06E-04 | 1.54E-04         |
| Terrestrial acidification                        | kg SO <sub>2</sub> eq.    | 1.97E+03 | 1.95E+03          | 1.16E+01 | 3.54E+00         |
| Terrestrial ecotoxicity                          | kg 1,4-DCB eq.            | 1.82E+05 | 1.80E+05          | 1.08E+03 | 3.28E+02         |
| Water consumption                                | m <sup>3</sup>            | 1.11E+03 | 1.10E+03          | 6.57E+00 | 2.00E+00         |
| <b>a-Si</b>                                      |                           |          |                   |          |                  |

|                                                  |                           |          |          |          |          |
|--------------------------------------------------|---------------------------|----------|----------|----------|----------|
| Fine particulate matter formation                | kg PM <sub>2.5</sub> eq.  | 5.58E+01 | 5.54E+01 | 3.30E-01 | 1.01E-01 |
| Fossil resource scarcity                         | kg oil eq.                | 5.33E+03 | 5.29E+03 | 3.15E+01 | 9.60E+00 |
| Freshwater ecotoxicity                           | kg 1,4-DCB eq.            | 5.69E+03 | 5.64E+03 | 3.36E+01 | 1.02E+01 |
| Freshwater eutrophication                        | kg P eq.                  | 1.82E+01 | 1.80E+01 | 1.08E-01 | 3.28E-02 |
| Global warming potential                         | kg CO <sub>2</sub> eq.    | 2.23E+04 | 2.21E+04 | 1.32E+02 | 4.01E+01 |
| Human carcinogenic toxicity                      | kg 1,4-DCB eq.            | 3.33E+03 | 3.30E+03 | 1.97E+01 | 6.00E+00 |
| Human non-carcinogenic toxicity                  | kg 1,4-DCB eq.            | 7.48E+04 | 7.42E+04 | 4.42E+02 | 1.35E+02 |
| Ionizing radiation                               | kbq Co-60 eq.             | 2.02E+03 | 2.01E+03 | 1.20E+01 | 3.64E+00 |
| Land use                                         | m <sup>2</sup> a crop eq. | 5.79E+02 | 5.74E+02 | 3.42E+00 | 1.04E+00 |
| Marine ecotoxicity                               | kg 1,4-DCB eq.            | 7.32E+03 | 7.27E+03 | 4.33E+01 | 1.32E+01 |
| Mineral resource scarcity                        | kg Cu eq.                 | 3.38E+02 | 3.35E+02 | 2.00E+00 | 6.09E-01 |
| Ozone formation affecting human health           | kg NO <sub>x</sub> eq.    | 5.03E+01 | 5.00E+01 | 2.98E-01 | 9.07E-02 |
| Ozone formation affecting terrestrial ecosystems | kg NO <sub>x</sub> eq.    | 5.17E+01 | 5.13E+01 | 3.06E-01 | 9.32E-02 |
| Stratospheric ozone depletion                    | kg CFC11 eq.              | 8.71E-03 | 8.64E-03 | 5.15E-05 | 1.57E-05 |
| Terrestrial acidification                        | kg SO <sub>2</sub> eq.    | 1.15E+02 | 1.14E+02 | 6.82E-01 | 2.08E-01 |
| Terrestrial ecotoxicity                          | kg 1,4-DCB eq.            | 2.40E+05 | 2.38E+05 | 1.42E+03 | 4.33E+02 |
| Water consumption                                | m <sup>3</sup>            | 2.31E+02 | 2.29E+02 | 1.37E+00 | 4.16E-01 |
| <b>Onshore wind</b>                              |                           |          |          |          |          |
| Fine particulate matter formation                | kg PM <sub>2.5</sub> eq.  | 1.50E+01 | 1.48E+01 | 8.85E-02 | 2.69E-02 |
| Fossil resource scarcity                         | kg oil eq.                | 2.15E+03 | 2.13E+03 | 1.27E+01 | 3.88E+00 |
| Freshwater ecotoxicity                           | kg 1,4-DCB eq.            | 4.08E+03 | 4.05E+03 | 2.41E+01 | 7.34E+00 |
| Freshwater eutrophication                        | kg P eq.                  | 3.69E+00 | 3.66E+00 | 2.18E-02 | 6.64E-03 |

|                                                  |                           |          |          |          |          |
|--------------------------------------------------|---------------------------|----------|----------|----------|----------|
| Global warming potential                         | kg CO <sub>2</sub> eq.    | 7.94E+03 | 7.88E+03 | 4.70E+01 | 1.43E+01 |
| Human carcinogenic toxicity                      | kg 1,4-DCB eq.            | 1.20E+04 | 1.19E+04 | 7.09E+01 | 2.16E+01 |
| Human non-carcinogenic toxicity                  | kg 1,4-DCB eq.            | 1.96E+04 | 1.94E+04 | 1.16E+02 | 3.52E+01 |
| Ionizing radiation                               | kbq Co-60 eq.             | 4.56E+02 | 4.52E+02 | 2.70E+00 | 8.21E-01 |
| Land use                                         | m <sup>2</sup> a crop eq. | 9.27E+02 | 9.20E+02 | 5.48E+00 | 1.67E+00 |
| Marine ecotoxicity                               | kg 1,4-DCB eq.            | 5.02E+03 | 4.98E+03 | 2.97E+01 | 9.04E+00 |
| Mineral resource scarcity                        | kg Cu eq.                 | 1.88E+02 | 1.87E+02 | 1.11E+00 | 3.39E-01 |
| Ozone formation affecting human health           | kg NO <sub>x</sub> eq.    | 2.38E+01 | 2.36E+01 | 1.41E-01 | 4.29E-02 |
| Ozone formation affecting terrestrial ecosystems | kg NO <sub>x</sub> eq.    | 2.48E+01 | 2.47E+01 | 1.47E-01 | 4.48E-02 |
| Stratospheric ozone depletion                    | kg CFC11 eq.              | 3.46E-03 | 3.44E-03 | 2.05E-05 | 6.24E-06 |
| Terrestrial acidification                        | kg SO <sub>2</sub> eq.    | 2.73E+01 | 2.71E+01 | 1.61E-01 | 4.92E-02 |
| Terrestrial ecotoxicity                          | kg 1,4-DCB eq.            | 4.27E+04 | 4.23E+04 | 2.52E+02 | 7.69E+01 |
| Water consumption                                | m <sup>3</sup>            | 9.83E+01 | 9.76E+01 | 5.82E-01 | 1.77E-01 |

---

## References

- [1] Mordor Intelligence. (2023). Algae products market size & share analysis - growth trends & forecasts (2023 - 2028), from <https://www.mordorintelligence.com/>.
- [2] Milousi, M.; Souliotis, M.; Arampatzis, G.; Papaefthimiou, S. Evaluating the environmental performance of solar energy systems through a combined life cycle assessment and cost analysis. *Sustainability* **2019**, 11(9), 2539.
- [3] Hosseini, S.M.; Kanagaraj, N.; Sadeghi, S.; Yousefi, H. Midpoint and endpoint impacts of electricity generation by renewable and nonrenewable technologies: A case study of Alberta, Canada. *Renew. Energy* **2022**, 197, 22-39.
